# Supplementary material for: Smoking, second-hand smoke exposure and smoking cessation in relation to leukocyte telomere length and mortality
Source: PubMed Central journal article supplement (PMC5312393; doi:10.18632/oncotarget.11051), 2016-08-04
Supplement: oncotarget-07-60419-s001.pdf [file oncotarget-07-60419-s001.pdf]

## Smoking, second-hand smoke exposure and smoking cessation in relation to leukocyte telomere length and mortality

### SUPPLEMENTARY FIGURE AND TABLES

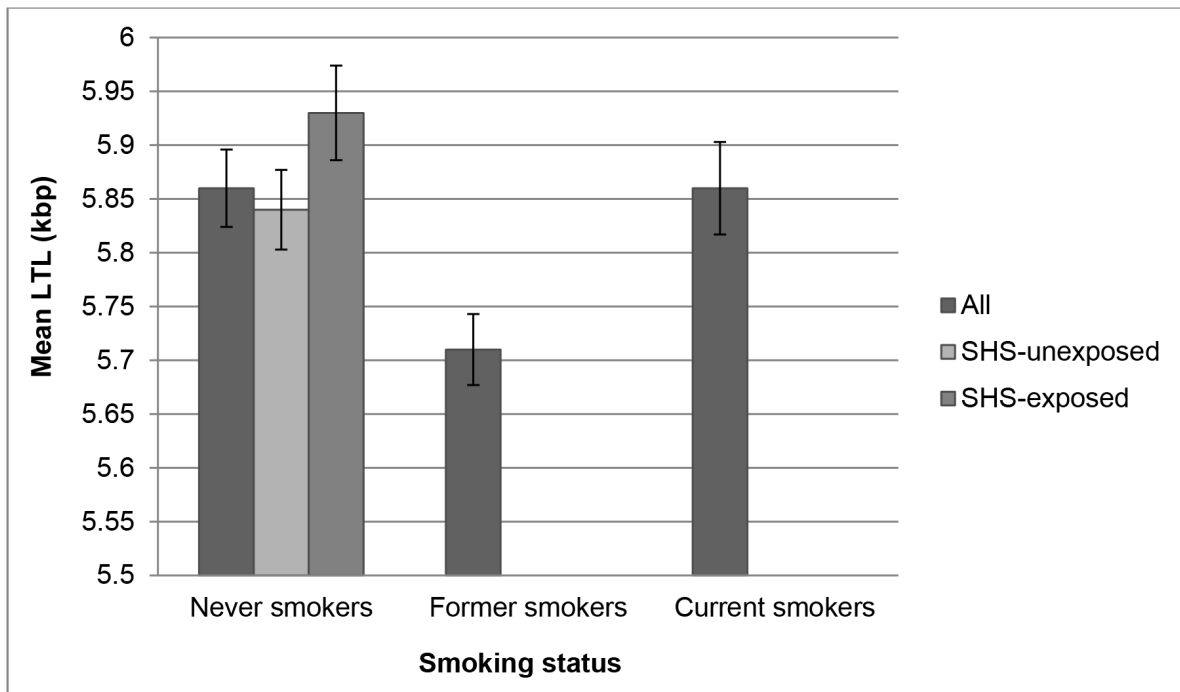

**Supplementary Figure S1: Weighted mean telomere length in kilo base pairs (kbp) among current, former and never smokers, overall.** Never smokers were stratified by any self-reported SHS exposure (either at home or workplace).

Supplementary Table S1: Univariable associations between covariates and mean LTL in base pairs

|                                                | Mean LTL difference (bp) | 95% CI    |
|------------------------------------------------|--------------------------|-----------|
| <b>Age, years</b>                              | -14                      | -16, -13  |
| <b>Sex</b>                                     |                          |           |
| Male                                           | Reference                |           |
| Female                                         | 11                       | -32, 55   |
| <b>Race/ethnicity</b>                          |                          |           |
| Non Hispanic white                             | Reference                |           |
| Non Hispanic black                             | 160                      | 83, 236   |
| Mexican American                               | 24                       | -95, 144  |
| Other                                          | 104                      | -55, 265  |
| <b>PIR</b>                                     |                          |           |
| <b>Education</b>                               |                          |           |
| Less than high school                          | Reference                |           |
| High school                                    | 80                       | 20, 140   |
| Higher education                               | 141                      | 81, 201   |
| <b>Vigorously active</b>                       |                          |           |
| No                                             | Reference                |           |
| Yes                                            | 176                      | 116, 234  |
| <b>Body mass index (BMI), kg/m<sup>2</sup></b> | -9                       | -12, -5   |
| <b>Alcohol consumption</b>                     |                          |           |
| Never                                          | Reference                |           |
| Up to once a week                              | -110                     | -247, 27  |
| 2–3 times per week                             | -7                       | -186, 171 |
| 4 times per week or more                       | -139                     | -299, 19  |

Supplementary Table S2: The association between smoking status and mean LTL in base pairs

|                              | Model 1 <sup>1</sup>     |            | Model 2 <sup>2</sup>     |           | Model 3 <sup>3</sup>     |           |
|------------------------------|--------------------------|------------|--------------------------|-----------|--------------------------|-----------|
|                              | Mean LTL difference (bp) | 95% CI     | Mean LTL difference (bp) | 95% CI    | Mean LTL difference (bp) | 95% CI    |
| <b>Self-reported history</b> |                          |            |                          |           |                          |           |
| <b>Current smokers</b>       |                          |            |                          |           |                          |           |
| vs former smokers            | -37                      | -87 to 12  | -25                      | -73 to 22 | -35                      | -86 to 15 |
| vs never smokers             | -50                      | -105 to 5  | -36                      | -88 to 17 | -35                      | -85 to 15 |
| <b>Former smokers</b>        |                          |            |                          |           |                          |           |
| vs never smokers             | -12                      | -51 to 27  | -10                      | -47 to 27 | 0.2                      | -35 to 36 |
| <b>Cotinine-confirmed</b>    |                          |            |                          |           |                          |           |
| <b>Current smokers</b>       |                          |            |                          |           |                          |           |
| vs former smokers            | -42                      | -90 to 5   | -32                      | -78,13    | -42                      | -90 to 6  |
| vs never smokers             | -55                      | -102 to -8 | -43                      | -86 to 1  | -43                      | -85 to -1 |
| <b>Former smokers</b>        |                          |            |                          |           |                          |           |
| vs never smokers             | -14                      | -59 to 32  | -12                      | -54 to 31 | -1                       | -41 to 38 |

<sup>1</sup>Adjusted for age (continuous), sex, and race/ethnicity.

<sup>2</sup>Adjusted for age (continuous), sex, race/ethnicity, PIR, and education.

<sup>3</sup>Adjusted for age (continuous), sex, race/ethnicity, PIR, education, BMI (continuous), vigorous physical activity, and alcohol consumption.

**Supplementary Table S3: Overview of previous studies on smoking and telomere length**

See Supplementary File 1
